# Supplementary material
Source: MDPI journal article supplement (https://www.mdpi.com/1999-4907/10/6/502)
Supplement: s1 [file s1]

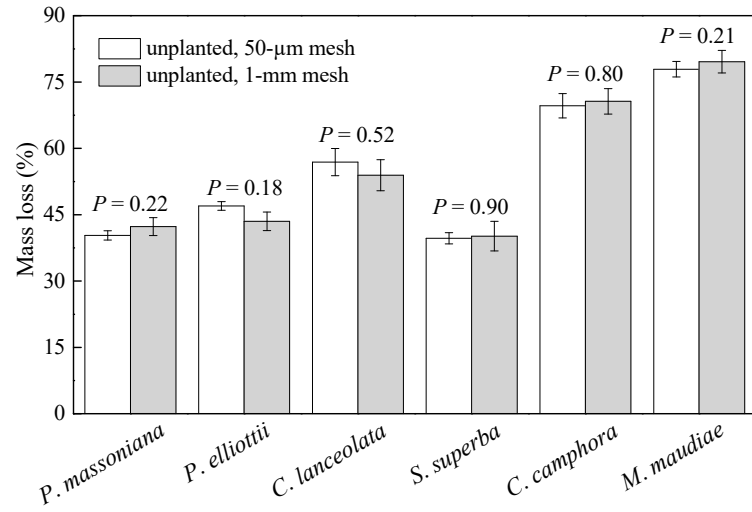

**Figure S1.** Differences in root litter mass loss between 1-mm and 50-µm mesh litterbags installed in unplanted pots (Figure 1b). *P*-values were obtained from linear mixed models conducted separately for each tree species. Values are mean ± SE.

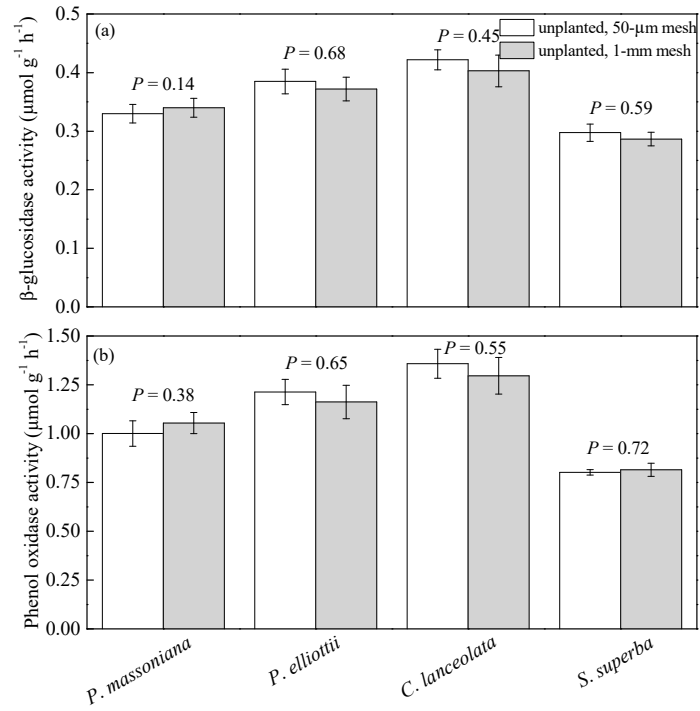

**Figure S2.** Differences in activities of  $\beta$ -glucosidase (a) and phenol oxidase (b) between 1-mm and 50- $\mu\text{m}$  mesh litterbags installed in unplanted pots (Figure 1b). *P*-values were obtained from linear mixed models conducted separately for each tree species. Values are mean  $\pm$  SE.
